# Supplementary material
Source: ML conference proceedings conference paper supplement (https://openreview.net/forum?id=vHRLS8HhK1)
Supplement: supplementary_material [file attachment]

## 1 Deviation of Eq (12)

2 For a generated path containing  $n_L + 1$  states,  $L = \{s_0, s_1, \dots, s_{n_L}\}$ ,  $v(s_t)$  is the estimated state  
 3 value, and  $z(s_t) = \sum_{j=t+1}^{n_L} r_j$  is the ground truth for value estimation by setting discount factor  
 4  $\gamma = 1$ . PC loss's learning target for state  $s_t$  is  $\bar{f}(s_t)$ , the mean of  $f$  values along the path, minus  
 5  $g(s_t)$ .  $\bar{f}(s_t)$  is calculated as Equation 1.

$$\begin{aligned}
 \bar{f}(s_t) &= \frac{1}{n_L + 1} \sum_{i=0}^{n_L} f(s_i) = \frac{1}{n_L + 1} \sum_{i=0}^{n_L} \left( \sum_{j=1}^i r_j + v(s_i) \right) \\
 &= \frac{1}{n_L + 1} \left[ \sum_{i=0}^{n_L} v(s_i) + \sum_{i=0}^{n_L} \sum_{j=1}^i r_i \right] = \frac{1}{n_L + 1} \left[ \sum_{i=0}^{n_L} v(s_i) + \sum_{i=1}^{n_L} (n_L + 1 - i) r_i \right] \\
 &= \sum_{i=1}^{n_L} r_i + \frac{\sum_{i=0}^{n_L} v(s_i) - \sum_{i=1}^{n_L} i \times r_i}{n_L + 1} = \sum_{i=1}^t r_i + \sum_{i=t+1}^{n_L} r_i + \frac{\sum_{i=0}^{n_L} v(s_i) - \sum_{i=1}^{n_L} \sum_{j=i}^{n_L} r_i}{n_L + 1} \\
 &= g(s_t) + z(s_t) + \frac{\sum_{i=0}^{n_L} [v(s_i) - z(s_i)]}{n_L + 1} \tag{1}
 \end{aligned}$$

6 Therefore, PC loss is

$$\begin{aligned}
 \mathcal{L}_{PC}(s_t) &= [v(s_t) - (\bar{f}(s_t) - g(s_t))]^2 \\
 &= \left\{ v(s_t) - z(s_t) - \frac{\sum_{i=0}^{n_L} [v(s_i) - z(s_i)]}{n_L + 1} \right\}^2 \\
 &= \frac{\left\{ \sum_{i \neq t} [v(s_t) - z(s_t) - v(s_i) + z(s_i)] \right\}^2}{(n_L + 1)^2} \\
 &= \frac{1}{(n_L + 1)^2} \left\{ \sum_{i>t} \left[ v(s_t; \theta) - \left( \sum_{j=t+1}^i r_j + v(s_i) \right) \right] \right. \\
 &\quad \left. - \sum_{i<t} \left[ v(s_i) - \left( \sum_{j=i+1}^t r_j + v(s_t; \theta) \right) \right] \right\}^2. \tag{2}
 \end{aligned}$$

7 Eq (13) is derived.

## 8 Deviation of Theorem 4.3

9 To prove Theorem 4.3, we first introduce three lemmas.

10 **Lemma 2.1.** Assume  $x \sim \mathcal{N}(\mu_1, \sigma_1^2)$ ,  $y \sim \mathcal{N}(\mu_2, \sigma_2^2)$ , where  $\mathcal{N}(\cdot, \cdot)$  denotes normal distribution. If  
 11  $x, y$  are independent of each other and  $\mu_2 > \mu_1$ , then

$$P(x > y) = \frac{1}{2} \exp \left\{ -\frac{1}{2} \frac{[(\mu_2 - \mu_1) / \sqrt{\sigma_1^2 + \sigma_2^2}]^2}{\cos^2 \xi} \right\} \tag{3}$$

12 where  $0 < \xi < \pi/2$  is a constant.

13 **Lemma 2.2.** Assume  $x_i \sim \mathcal{N}(\mu_i, \sigma_i^2)$ ,  $\forall i = 1, 2, \dots, m$ . Variables in  $\{x_i\}$  are independent of each  
 14 other.  $\mu_1 > \mu_i, \forall i = 2, 3, \dots, m$ . Then

$$P[x_1 = \max\{x_1, x_2, \dots, x_m\}] = \prod_{i=2}^m \left\{ 1 - \frac{1}{2} \exp \left\{ -\frac{(\mu_1 - \mu_i)^2}{2(\sigma_1^2 + \sigma_i^2) \cos^2 \xi_i} \right\} \right\} \tag{4}$$

15 Proof of Lemma 2.1 was previously given in [4], and the details are summarized as follows.

16  $\therefore f(x, y) = f(x)f(y)$ , to see Fig 1 (a), we have

$$\begin{aligned} P(x > y) &= \iint_{x>y} f(x)f(y)dxdy \\ &= \iint_{x>y} \frac{1}{\sqrt{2\pi}\sigma_0} \exp\left\{-\frac{1}{2}\left(\frac{x-\mu_0}{\sigma_0}\right)^2\right\} \times \frac{1}{\sqrt{2\pi}\sigma_1} \exp\left\{-\frac{1}{2}\left(\frac{y-\mu_1}{\sigma_1}\right)^2\right\} dxdy \end{aligned} \quad (5)$$

17 Let  $(x - \mu_0)/(\sqrt{2}\sigma_0) = u$ ,  $(y - \mu_1)/(\sqrt{2}\sigma_1) = v$ , then  $|J| = 2\sigma_0\sigma_1$ , where  $|J|$  is the Jacobian  
18 determinant.

19 Domain  $D$ :  $x > y$  become  $D_1$ :  $\sqrt{2}\sigma_0 + \mu_0 > \sqrt{2}\sigma_1v + \mu_1$ .

20 By formula

$$\iint_D f(x, y)dxdy = \iint_{D_1} f[x(u, v), y(u, v)]|J|dudv \quad (6)$$

$$\begin{aligned} P(x > y) &= \frac{1}{\pi} \iint_{D_1} \exp[-(u^2 + v^2)]dudv \\ &= \frac{1}{\pi} \iint_{D_1+D_2} \exp[-(u^2 + v^2)]dudv - \frac{1}{\pi} \iint_{D_2} \exp[-(u^2 + v^2)]dudv \end{aligned} \quad (7)$$

21 See Fig. 1 (b), let  $u = \rho \cos \phi$ ,  $v = \rho \sin \phi$ .

$$\iint_{D_1+D_2} \exp[-(u^2 + v^2)]dudv = \int_{-\pi+\phi_1}^{\phi_1} d\phi \int_0^\infty \exp(-\rho^2)d\rho = \pi/2 \quad (8)$$

22 where  $r = [(\mu_1 - \mu_0)/(\sqrt{2}\sigma_0)] \times [\sin \phi_1 / \sin(\phi_1 - \phi)]$ .

$$\begin{aligned} \iint_{D_2} \exp[-(u^2 + v^2)]dudv &= \int_{-\pi+\phi_1}^{\phi_1} \left[ \int_0^r \rho \exp(-\rho^2)d\rho \right] d\phi \\ &= \frac{\pi}{2} - \frac{1}{2} \int_{-\pi+\phi_1}^{\phi_1} \exp\left\{-\left(\frac{(\mu_1 - \mu_0) \times \sin \phi_1}{\sqrt{2}\sigma_0 \times \sin(\phi_1 - \phi)}\right)^2\right\} d\phi \\ &= \frac{\pi}{2} - \frac{1}{2} \int_{-\pi/2}^{\pi/2} \exp\left\{-\left(\frac{(\mu_1 - \mu_0) \times \sin \phi_1}{\sqrt{2}\sigma_0 \times \cos \theta}\right)^2\right\} d\theta \end{aligned} \quad (9)$$

23 Let  $\theta = \phi_1 - \phi - \pi/2$ . Therefore,

$$\begin{aligned} P(x > y) &= \frac{1}{\pi} \int_0^{\pi/2} \exp\left\{-\left(\frac{\mu_1 - \mu_0}{\sqrt{2}\sigma_0} \sin \phi_1\right)^2 / \cos^2 \theta\right\} d\theta \\ &= \frac{1}{\pi} \int_0^{\pi/2} \exp\left\{-\frac{1}{2}\left(\frac{\mu_1 - \mu_0}{\cos \theta \sqrt{\sigma_0^2 + \sigma_1^2}}\right)^2\right\} d\theta \end{aligned} \quad (10)$$

24  $\therefore \arctan \phi_1 = \sigma_0/\sigma_1$ ,  $\therefore \sin \phi_1 = \sigma_0/\sqrt{\sigma_0^2 + \sigma_1^2}$ . From the Mean-value theorem for integrals [1]

$$\begin{aligned} P(x > y) &= \frac{1}{\pi} \int_0^{\pi/2} \exp\left\{-\frac{1}{2}\left(\frac{\mu_1 - \mu_0}{\sqrt{\sigma_0^2 + \sigma_1^2}}\right)^2 / \cos^2 \theta\right\} d\theta \\ &= \frac{1}{2} \exp\left\{-\frac{1}{2}\left(\frac{\mu_1 - \mu_0}{\sqrt{\sigma_0^2 + \sigma_1^2}}\right)^2 / \cos^2 \xi\right\} \end{aligned} \quad (11)$$

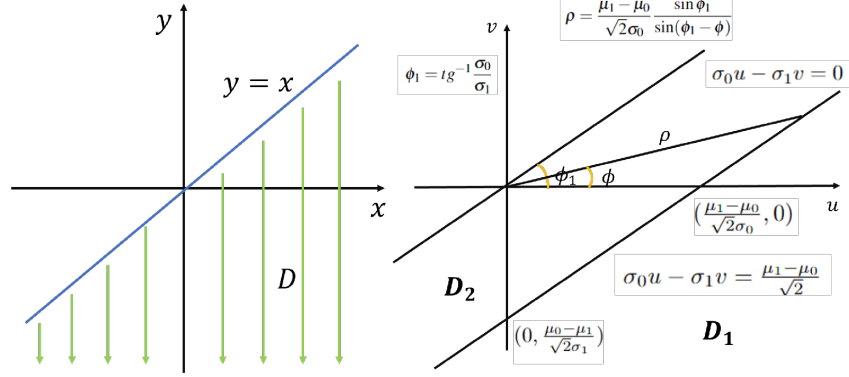

Figure 1: Left: (a), Right: (b)

25 Where  $0 < \xi < \pi/2$  is a constant. Q.E.D.

26 Lemma 2.2 is proved according to Eq. (3) on the basis of Lemma 2.1, as follows:

$$\begin{aligned}
 P[x_1 = \max\{x_1, x_2, \dots, x_m\}] &= \prod_{i=2}^m P(x_1 \geq x_i) \\
 &= \prod_{i=2}^m [1 - P(x_i > x_1)] \\
 &= \prod_{i=2}^m \left\{ 1 - \frac{1}{2} \exp \left\{ -\frac{(\mu_1 - \mu_i)^2}{2(\sigma_1^2 + \sigma_i^2) \cos^2 \xi_i} \right\} \right\}. \tag{12}
 \end{aligned}$$

27 **Lemma 2.3.** *Lindeberg–Lévy Central Limit Theory [2]: Suppose  $\{X_1, \dots, X_n\}$  is a sequence of*  
 28 *i.i.d. random variables with  $E[X_i] = \mu$  and  $\text{Var}[X_i] = \sigma^2 < \infty$ . Then*

$$\lim_{n \rightarrow \infty} \bar{X}_n \sim \mathcal{N}(\mu, \sigma^2/n). \tag{13}$$

29 Next, we give the proof of the Theorem 4.3. While doing MCTS, a scouted subtree  $T(s_t)$  is generated  
 30 and it contains  $K + 1$  nodes including  $s_t$  after  $K$  simulations as illustrated in the left of Figure 2.  
 31 Based on Eq. (8), the estimated root state value  $v(s_t)$  is calculated as:

$$v(s_t) = \frac{\sum_{s' \in T(s_t)} f(s')}{K + 1} - g(s_t). \tag{14}$$

32

33 For a Markov sequential decision problem, the probability of the optimal path  $L^* = \{s_0, \dots, s_{n_L}\}$   
 34 being found by MCTS is:

$$\begin{aligned}
 P_g &= P(s_0 \rightarrow s_1, s_1 \rightarrow s_2, \dots, \rightarrow s_{n_L}) \\
 &= \prod_{t=0}^{n_L-1} P(s_t \rightarrow s_{t+1}), \tag{15}
 \end{aligned}$$

35 where  $P(s_t \rightarrow s_{t+1})$  denotes the probability that  $s_{t+1}$  is selected while searching with state  $s_t$  as the  
 36 root node. As shown in the right of Figure 2, assume state  $s_t$  has  $m$  children and the first child  $s_{t+1}^1$   
 37 is in the optimal path. According to Assumption 4.2,  $f$  values of  $\{s_{t+1}^i, i = 2, 3, \dots, m\}$  as well as  
 38 their descendant states are variables sampled from i.i.d. distribution  $Pr(\mu_1^f, \sigma_1^2)$ , because the optimal  
 39 path is in the subtree of  $s_{t+1}^1$ . Based on Lemma 2.3 and Eq. (14),  $r_{t+1}^i + v(s_{t+1}^i) \sim \mathcal{N}(\mu_1^f - g(s_t),$   
 40  $\sigma_1^2/K_{t+1}^i)$  where  $K_{t+1}^i$  is the simulation times of  $s_{t+1}^i$ . The  $s_{t+1}^1$  is assumed to be the optimal child  
 41 of  $s_t$  and  $T(s_{t+1}^1)$  is composed by both the states in the optimal path and the ones not in the optimal  
 42 path. Assume there are  $K_{t+1}^*$  descendants in the optimal path and  $K_{t+1}^1 - K_{t+1}^*$  descendants are

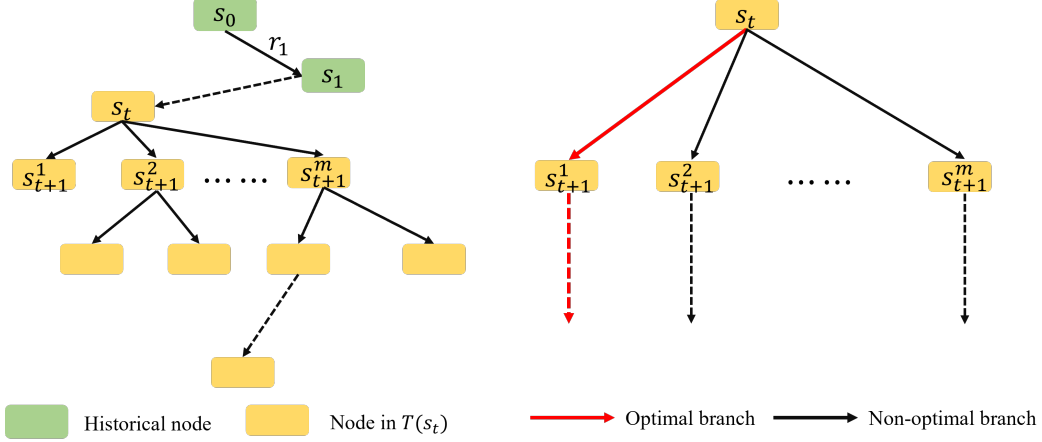

Figure 2: Left: a simulation of MCTS.  $s_t$  is current state and  $T(s_t)$  is the scouted subtree rooted with  $s_t$ , containing  $K$  nodes.  $s_{t+k}$  is the expanded node in  $k$ th simulation; Right:  $s_{t+1}^1$  is selected after MCTS simulation rooted with  $s_t$ .

43 not in the optimal path. Let  $T^*$  and  $\overline{T^*}$  represent the descendant set in or not in the optimal path  
44 separately.  $T(s) = T^* \cup \overline{T^*}$  and  $T^* \cap \overline{T^*} = \emptyset$ . In this situation:

$$\begin{aligned}
\bar{f} &= \frac{\sum_{s' \in T(s_{t+1}^i)} f(s')}{K_{t+1}^1} = \frac{\sum_{s' \in T^*} f(s') + \sum_{s' \in \overline{T^*}} f(s')}{K_{t+1}^1} \\
&= \frac{K_{t+1}^*}{K_{t+1}^1} \mu_0^f + \frac{K_{t+1}^1 - K_{t+1}^*}{K_{t+1}^1} \frac{1}{K_{t+1}^1 - K_{t+1}^*} \sum_{s' \in \overline{T^*}} f(s'). \tag{16}
\end{aligned}$$

45  $\sum_{s' \in \overline{T^*}} f(s') / (K_{t+1}^1 - K_{t+1}^*)$  is the mean of  $K_{t+1}^1 - K_{t+1}^*$  variables sampled from  $Pr(\mu_1^f, \sigma_1^2)$ .  
46 Therefore,  $\sum_{s' \in \overline{T^*}} f(s') / (K_{t+1}^1 - K_{t+1}^*) \sim \mathcal{N}(\mu_1^f, \sigma_1^2 / (K_{t+1}^1 - K_{t+1}^*))$  according to the central  
47 limit theory in Lemma 2.3. Therefore,

$$\begin{aligned}
&\frac{K_{t+1}^1 - K_{t+1}^*}{K_{t+1}^1} \frac{1}{K_{t+1}^1 - K_{t+1}^*} \sum_{s' \in \overline{T^*}} f(s') \sim \mathcal{N}\left(\frac{K_{t+1}^1 - K_{t+1}^*}{K_{t+1}^1} \mu_1^f, \frac{K_{t+1}^1 - K_{t+1}^*}{(K_{t+1}^1)^2} \sigma_1^2\right) \\
48 \quad \bar{f} &\sim \mathcal{N}\left(\frac{K_{t+1}^*}{K_{t+1}^1} \mu_0^f + \frac{K_{t+1}^1 - K_{t+1}^*}{K_{t+1}^1} \mu_1^f, \frac{K_{t+1}^1 - K_{t+1}^*}{(K_{t+1}^1)^2} \sigma_1^2\right) \\
&= \mathcal{N}\left(\frac{K_{t+1}^*}{K_{t+1}^1} (\mu_0^f - \mu_1^f) + \mu_1^f, \frac{K_{t+1}^1 - K_{t+1}^*}{(K_{t+1}^1)^2} \sigma_1^2\right)
\end{aligned}$$

49 Therefore,  $r_{t+1}^1 + v(s_{t+1}^1) = \bar{f} - g(s_t) \sim \mathcal{N}(\mu_1^f - g(s_t) + \frac{K_{t+1}^*}{K_{t+1}^1} (\mu_0^f - \mu_1^f), \frac{K_{t+1}^1 - K_{t+1}^*}{(K_{t+1}^1)^2} \sigma_1^2)$ . When  
50 the simulation is finished, the decision is made based on

$$a_{t+1} = \arg \max_i \{r_{t+1}^i + v(s_{t+1}^i)\}. \tag{17}$$

51 In summary, for the optimal child  $s_{t+1}^1$ , we have  $r_{t+1}^1 + v(s_{t+1}^1) \sim \mathcal{N}(\mu_1^f - g(s_t) + \frac{K_{t+1}^*}{K_{t+1}^1} (\mu_0^f - \mu_1^f) -$   
52  $\mu_1^f, \frac{K_{t+1}^1 - K_{t+1}^*}{(K_{t+1}^1)^2} \sigma_1^2)$  and for state  $s_{t+1}^i (i > 1)$ ,  $r_{t+1}^i + v(s_{t+1}^i) \sim \mathcal{N}(\mu_1^f - g(s_t), \frac{\sigma_1^2}{K_{t+1}^i})$ . The  
53 probability that the optimal child  $s_{t+1}^1$  is selected is

$$P(s_t \rightarrow s_{t+1}^1) = P(r_{t+1}^1 + v(s_{t+1}^1) = \max_i \{r_{t+1}^i + v(s_{t+1}^i)\} | i \in [1, m]) \tag{18}$$

54 According to the Lemma 2.2, we have

$$P(s_t \rightarrow s_{t+1}^1) = \prod_{i=2}^m \left\{ 1 - \frac{1}{2} \exp \left\{ - \frac{\left( \frac{K_{t+1}^*}{K_{t+1}^1} (\mu_0^f - \mu_1^f) \right)^2}{2 \left( \frac{\sigma_1^2}{K_{t+1}^i} + \frac{(K_{t+1}^1 - K_{t+1}^*) \sigma_1^2}{(K_{t+1}^1)^2} \right) \cos^2 \xi_i} \right\} \right\}. \tag{19}$$

55 Let  $K'$  denotes the least simulation times, that is  $K_{t+1}^i \geq K'$  for all states.  $\cos^2 \xi_i \leq 1$  always  
 56 established. Therefore,

$$P(s_t \rightarrow s_{t+1}^1) \geq \left\{ 1 - \frac{1}{2} \exp \left\{ - \frac{\left( \frac{K_{t+1}^*}{K_{t+1}^1} (\mu_0^f - \mu_1^f) \right)^2}{2 \left( \frac{1}{K'} + \frac{K_{t+1}^1 - K_{t+1}^*}{(K')^2} \right) \sigma_1^2} \right\} \right\}^{m-1} \quad (20)$$

57 Based on Eq 15, the probability of the optimal path  $L^* = \{s_0, \dots, s_{n_L}\}$  being found by MCTS is

$$\begin{aligned} P_g &= \prod_{t=0}^{n_L-1} P(s_t \rightarrow s_{t+1}) \geq \prod_{t=0}^{n_L-1} \left\{ 1 - \frac{1}{2} \exp \left\{ - \frac{\left( \frac{K_{t+1}^*}{K_{t+1}^1} (\mu_0^f - \mu_1^f) \right)^2}{2 \left( \frac{1}{K'} + \frac{K_{t+1}^1 - K_{t+1}^*}{(K')^2} \right) \sigma_1^2} \right\} \right\}^{m-1} \\ &= \prod_{t=1}^{n_L} \left\{ 1 - \frac{1}{2} \exp \left\{ - \frac{[b_t(\mu_0^f - \mu_1^f)]^2}{2(1/K' + m_t)\sigma_1^2} \right\} \right\} \end{aligned} \quad (21)$$

58 where  $b_t = K_t^*/K_t^1$ ,  $m_t = (K_t^1 - K_t^*)/(K_t^1)^2$ , and  $K'$  denotes the least simulation times, that is  
 59  $K_t^i \geq K'$  for an arbitrary state. If MCTS's simulation times  $K$  is large enough, every child will be  
 60 visited enough times because of the exploration term in Eq. (6), that are  $K' \rightarrow +\infty$ ,  $m_t \rightarrow 0$ , and  
 61  $b_t$  approaches a constant when  $K \rightarrow +\infty$ . If  $b_t = \infty$ , the optimal branch will always be selected  
 62 according to Eq. (6) until  $b_t$  becoming a limited constant. Therefore, we have

$$\lim_{K \rightarrow \infty} P_g \geq \prod_{t=1}^{n_L} \left\{ 1 - \frac{1}{2} \exp \left\{ - \frac{[b_t(\mu_0^f - \mu_1^f)]^2}{2(1/K')\sigma_1^2} \right\} \right\} \quad (22)$$

Theorem 4.3 has been proven.

Table 1: Winning rate of PCZero against AlphaZero without PC (in percentage %).

| BoardSize       | 8 × 8         |             | 9 × 9         |             | 13 × 13       |             |
|-----------------|---------------|-------------|---------------|-------------|---------------|-------------|
| Player          | Greedy Player | MCTS Player | Greedy Player | MCTS Player | Greedy Player | MCTS Player |
| $\lambda = 0.1$ | <b>53.1</b>   | <b>56.3</b> | 51.9          | 56.8        | 47.6          | 49.4        |
| $\lambda = 0.5$ | 49.2          | 54.7        | <b>54.3</b>   | 49.4        | 51.5          | 49.1        |
| $\lambda = 1.0$ | 48.4          | 50.0        | 53.1          | <b>54.3</b> | 44.7          | 53.6        |
| $\lambda = 2.0$ | 51.6          | 53.1        | 53.1          | <b>59.9</b> | <b>52.1</b>   | <b>63.9</b> |

Table 2: Test results with 32 seeds, presented as mean±standard deviation.

| Game         | EfficientZero <sup>†</sup> | GW-PCZero         | Game         | EfficientZero <sup>†</sup> | GW-PCZero        |
|--------------|----------------------------|-------------------|--------------|----------------------------|------------------|
| Alien        | 850.6 ± 339.2              | 699.7 ± 130.7     | Amidar       | 60.6 ± 2.42                | 97.0 ± 12.3      |
| Assault      | 994.8 ± 181.4              | 1224.1 ± 371.2    | Asterix      | 17734.4 ± 2921.9           | 14771.9 ± 5018.8 |
| BankHeist    | 276.9 ± 40.4               | 207.2 ± 59.8      | BattleZone   | 15875.0 ± 4614.9           | 13500.0 ± 6557.4 |
| Boxing       | 28.2 ± 7.2                 | 41.6 ± 11.7       | Breakout     | 366.7 ± 56.1               | 450.0 ± 160.8    |
| ChopperCmd   | 818.8 ± 323.5              | 1150.0 ± 362.3    | CrazyClimber | 8059.4 ± 2242.9            | 9734.4 ± 4233.3  |
| DemonAttack  | 7940.8 ± 3835.9            | 24074.1 ± 15593.6 | Freeway      | 0.0 ± 0.0                  | 0.0 ± 0.0        |
| Frostbite    | 229.1 ± 19.9               | 249.7 ± 16.3      | Gopher       | 1325.6 ± 638.3             | 1286.9 ± 803.1   |
| Hero         | 7537.2 ± 81.7              | 8171.3 ± 795.3    | Jamesbond    | 300.0 ± 179.0              | 525.0 ± 252.5    |
| Kangaroo     | 525.0 ± 277.3              | 262.5 ± 145.2     | Krull        | 3818.5 ± 600.5             | 7782.0 ± 1018.6  |
| KungFuMaster | 8956.3 ± 1816.4            | 20543.8 ± 5216.1  | MsPacman     | 967.5 ± 320.9              | 1594.1 ± 746.8   |
| Pong         | 15.6 ± 4.5                 | 19.8 ± 1.2        | PrivateEye   | 0.0 ± 0.0                  | 96.9 ± 17.4      |
| Qbert        | 8120.3 ± 632.2             | 13651.6 ± 2216.1  | RoadRunner   | 3443.7 ± 1058.6            | 16809.4 ± 3635.1 |
| Seaquest     | 478.1 ± 82.8               | 768.1 ± 210.8     | UpNDown      | 7592.5 ± 3997.6            | 12344.7 ± 5173.7 |

63

### 64 3 Investigation of $\lambda$ on board games

65 Table 1 shows the winning rate of PCZero against AlphaZero without path consistency in Hex game  
 66 with different board sizes. The larger the size of the board, the more complex the problem becomes.  
 67 We can see that the game with a smaller board size should have a smaller PC loss weight  $\lambda$  and the  
 68 game with a larger board size should have a larger  $\lambda$  to fully utilize path consistency.

## 69 4 Variance of the result

70 Tested with 32 seeds, result with standard deviation is summarized in Table 2.

## 71 5 Hyper-parameters setting

72 Neural network in this paper is the same as EfficientZero. Hyper-parameters are listed in Table 3,  
73 which are the same with EfficientZero except that training steps are changed from 120k to 60k and  
74 the off-policy value correction is disabled. State value is reanalyzed with value network instead of  
MCTS’s root value.

Table 3: Hyper-parameters of the learning process

| Parameter                                    | Setting            |
|----------------------------------------------|--------------------|
| Observation down-sampling shape              | 96 × 96            |
| Frames stacked                               | 4                  |
| Frames skip                                  | 4                  |
| Discount factor                              | 0.997 <sup>4</sup> |
| Batch size                                   | 256                |
| Optimizer                                    | SGD                |
| Learning rate                                | 0.2 → 0.02         |
| Momentum                                     | 0.9                |
| Weight decay                                 | 0.0001             |
| Max gradient norm                            | 5                  |
| Priority exponent                            | 0.6                |
| Priority correction                          | 0.4 → 1            |
| Training steps                               | 60k                |
| Evaluation episodes                          | 32                 |
| Min replay size for sampling                 | 2,000              |
| Self-play network updating interval          | 100                |
| Target network updating interval             | 200                |
| Unroll steps                                 | 5                  |
| TD steps                                     | 5                  |
| Policy loss coefficient                      | 1.0                |
| Value loss coefficient                       | 0.25               |
| Self-supervised consistency loss coefficient | 2.0                |
| Value prefix loss coefficient                | 1.0                |
| Dirichlet noise ratio                        | 0.3                |
| Number of simulations in MCTS                | 50                 |
| Reanalyzed policy ratio                      | 0.99               |
| Selfplay max moves                           | 108,000            |
| Test max moves                               | 12,000             |
| LSTM horizon                                 | 5                  |
| LSTM hidden size                             | 512                |
| Network parameter initialize zero            | True               |
| Clip reward                                  | True               |
| RGB image based                              | True               |
| Do self-supervised consistency               | True               |
| Use value-prefix                             | True               |
| MCTS Off-policy value correction             | False              |

75

## 76 6 Comparison of evaluation curves

77 Learning curves of all 26 Atari games are displayed in Figure 3, 4 & 5.

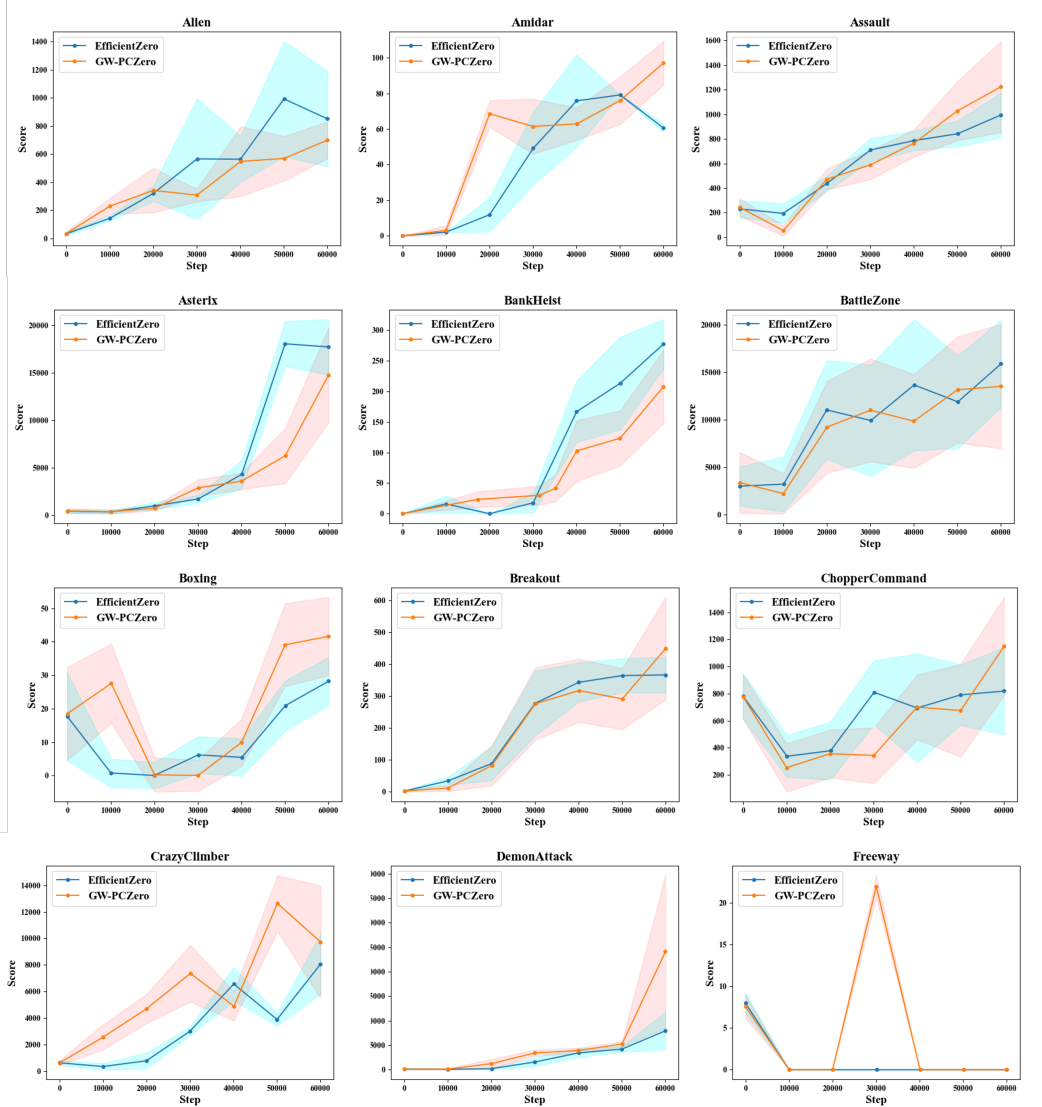

Figure 3: Learning curves (Part 1)

## 7 Experiment on more games

### 7.1 Hex game

In this section, the idea of weighting path consistency is applied to PCZero on  $13 \times 13$  Hex game. In PCZero [6], the learning target is calculated as the mean of  $l$  upstream states and  $k$  downstream states in Eq (23).

$$t_{PC}(s_t) = \frac{1}{l+k} \sum_{i=-l}^k v(s_{t+i}). \quad (23)$$

Considering weighting mechanism, the learning target is calculated by:

$$t_{PC}(s_t) = \sum_{i=-l}^k w_i v(s_{t+i}) / \sum_{i=-l}^k w_i, \quad (24)$$

where  $w_i$  is linear decay weight. As the distance from  $s_t$  increases,  $w_i$  decreases proportionally as shown in Eq (25)

$$w_i = b_0 - a_0 \times |i|. \quad (25)$$

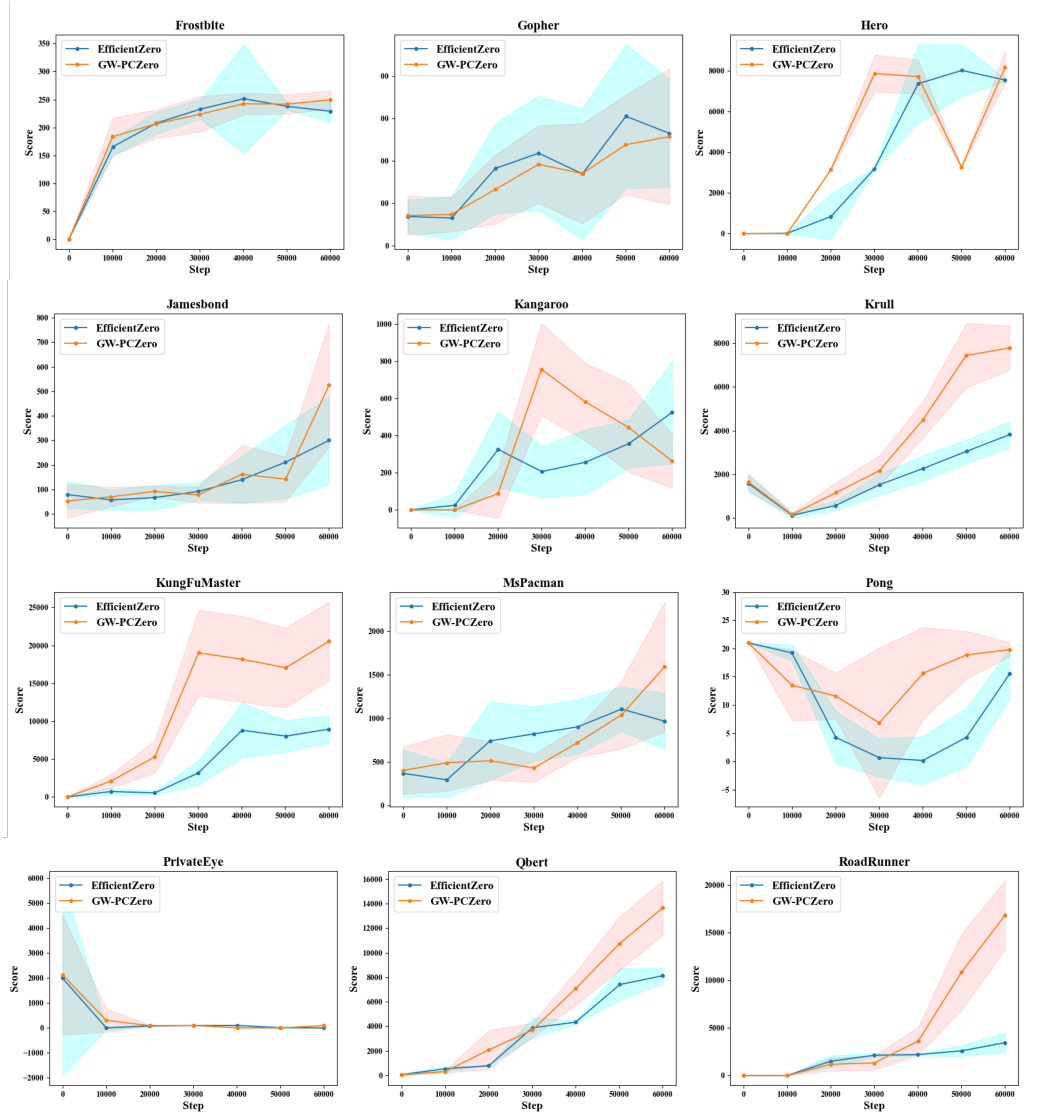

Figure 4: Learning curves (Part 2)

86 In the experiment,  $b_0 = 1.0$  and  $a_0 = 0.1$ . Trained with the same dataset with PCZero, which  
 87 is consist of 900k selfplay games, Weighted PCZero beats the original PCZero with 175 : 163  
 88 score, when the simulation times of MCTS is 800, demonstrating that weighting mechanism is also  
 89 beneficial to PCZero and it deserves further investigation.

## 90 7.2 Classic control problem

91 We also investigate the idea of generalized weighted path consistency on MuZero [3]. The implemen-  
 92 tation of PC is exactly the same as GW-PCZero, except that the underlying EfficientZero has been re-  
 93 placed with MuZero, which is available in <https://github.com/koulanurag/muzero-pytorch>.  
 94 The CartPole problem is used for comparison, for which the goal is to balance the pole by applying  
 95 forces in the left and right direction on the cart. The learning cures are displayed in Figure 6. On the  
 96 left is MuZero without reanalyzing. on the right is MuZero with reanalyzing and the proportion of  
 97 reanalyzing is 0.99. Path consistency significantly improves the model’s performance in both cases.  
 98 The idea of generalized weighted path consistency is also effective for MuZero.



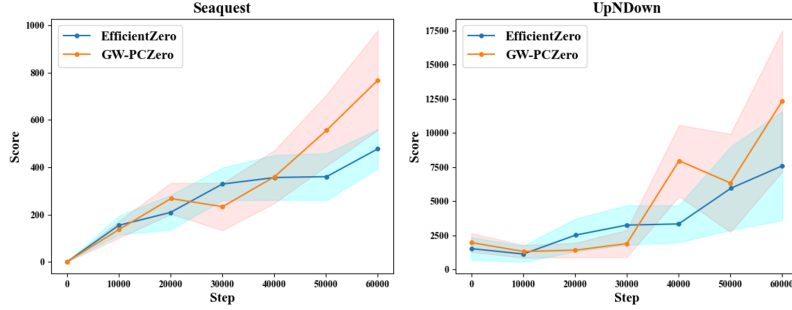

Figure 5: Learning curves (Part 3)

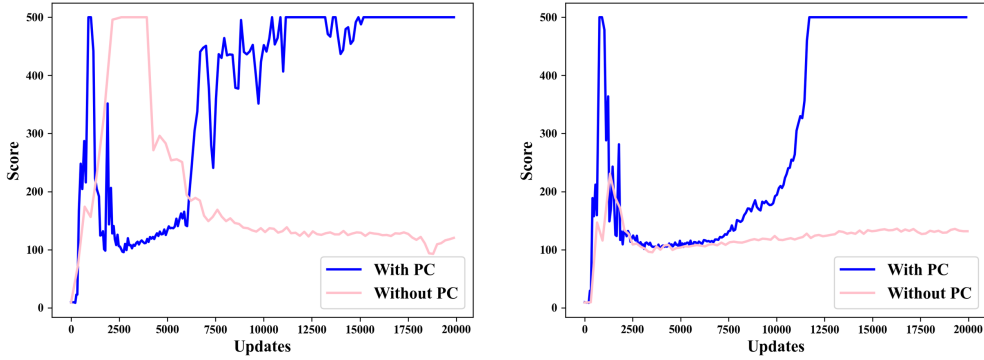

Figure 6: Learning curves for MuZero with and without path consistency. (Left: MuZero without reanalyze; Right: MuZero with 0.99 reanalyze rate.)

99 **8 Pseudocode for GW-PCZero**

100 In this section, we will provide a brief summary of the pseudocode for GW-PCZero. As  
 101 shown in Algorithm 1, the entire training process can be divided into three parts. The first part  
 102 involves collecting game frames by employing a MCTS player guided by the policy and value  
 103 network. The second part entails reanalyzing the collected states in the playing path to generate labels  
 104 for training the model. This process is illustrated in Algorithm 1, and the PC target is prepared by  
 105 calculating the weighted average of the  $f$  values along the path, as depicted in Algorithm 3. The  
 106 third part entails updating the policy model and value model using the prepared data, where the loss  
 107 function is defined in Equation (2). In this equation,  $\mathcal{L}_{RL}$  is the same as that used in EfficientZero  
 [5], and  $\mathcal{L}_{PC}$  is defined in Equation (10).

---

**Algorithm 1:** Framework for GW-PCZero

---

**Input:** Training steps  $N$

**Output:** Policy and value network.

- 1: Initialize policy network  $\pi$  and value network  $v$ .
  - 2:  $n \leftarrow 0$
  - 3: **while**  $n < N$  **do**
  - 4:   Collect playing game frames with MCTS player guided by  $\pi$  and  $v$ .
  - 5:   Prepare learning target by reanalysis with MCTS in Algorithm 2.
  - 6:   Update  $\pi$  and  $v$  using the loss function defined in Eq. (2).
  - 7: **end while**
  - 8: **return**  $t_{PC} = T / \sum w_i$ .
-

---

**Algorithm 2:** Sample Preparation for GW-PCZero

---

**Input:** Replay buffer  $\mathcal{R}$ , Unrolled steps  $l$ .

**Output:**  $(\pi, z, t_{PC})$ .

- 1: Sample unrolled sequences with  $l + 1$  states from  $\mathcal{R}$ .
  - 2: **for** each sampled sequence **do**
  - 3:   Reanalyze policy target  $\pi$  by MCTS.
  - 4:   Recalculate value target  $z$  by bootstrapping in Eq. (9).
  - 5:   Estimate PC target  $t_{PC}$  according to Algorithm 3.
  - 6: **end for**
  - 7: **return** Tuple  $(\pi, z, t_{PC})$ .
- 

---

**Algorithm 3:** Weighted PC target  $t_{PC}$  estimation

---

**Input:**  $S = \{s_t, r_{t+1}, s_{t+1}, \dots, s_{t+l}\}$ , value function  $v(s)$  and weights  $w = \{w_0, w_1, \dots, w_l\}$ .

**Output:** Target  $t_{PC}$ .

- 1: Initialize  $T = 0$ .
  - 2: **for** each state  $s_{t+i}$  in  $S$  **do**
  - 3:    $T = T + w_i \times \left[ \sum_{j=1}^i r_{t+j} + v(s_{t+i}) \right]$
  - 4: **end for**
  - 5: **return**  $t_{PC} = T / \sum w_i$ .
- 

## 108 References

- 109 [1] Tom M Apostol and CM Ablow. Mathematical analysis. *Physics Today*, 11(7):32, 1958.
- 110 [2] Radha G Laha and Vijay K Rohatgi. *Probability theory*. Courier Dover Publications, 2020.
- 111 [3] Julian Schrittwieser, Ioannis Antonoglou, Thomas Hubert, Karen Simonyan, Laurent Sifre, Simon Schmitt,  
112 Arthur Guez, Edward Lockhart, Demis Hassabis, Thore Graepel, et al. Mastering atari, go, chess and shogi  
113 by planning with a learned model. *Nature*, 588(7839):604–609, 2020.
- 114 [4] Lei Xu, Pingfan Yan, and Tong Chang. Algorithm cnneim-a and its mean complexity. In *Proc. of 2nd*  
115 *international conference on computers and applications*. IEEE Press, Beijing, pages 494–499, 1987.
- 116 [5] Weirui Ye, Shaohuai Liu, Thanard Kurutach, Pieter Abbeel, and Yang Gao. Mastering atari games with  
117 limited data. *Advances in Neural Information Processing Systems*, 34:25476–25488, 2021.
- 118 [6] Dengwei Zhao, Shikui Tu, and Lei Xu. Efficient learning for AlphaZero via path consistency. In *Proceedings*  
119 *of the 39th International Conference on Machine Learning*, volume 162 of *Proceedings of Machine Learning*  
120 *Research*, pages 26971–26981. PMLR, 17–23 Jul 2022.
